# Supplementary material for: Analysis of NAC Domain Transcription Factor Genes of Tectona grandis L.f. Involved in Secondary Cell Wall Deposition
Source: MDPI journal article supplement (doi:10.3390/genes11010020), 2019-12-23
Supplement: s1 [file s1]

# Analysis of NAC Domain Transcription Factor Genes of *Tectona grandis* Involved in Secondary Cell Wall Deposition

**Fernando Manuel Matias Hurtado<sup>1,3</sup>, Máisa de Siqueira Pinto<sup>1,4</sup>, Perla Novais de Oliveira<sup>1,5</sup>, Diego Mauricio Riaño-Pachon<sup>2,6</sup>, Laura Beatriz Inocente<sup>1,7</sup> and Helaine Carrer<sup>1,8\*</sup>**

<sup>1</sup>Department of Biological Sciences, Luiz de Queiroz College of Agriculture (ESALQ), University of São Paulo, Av. Pádua Dias, 11, CP 9, Piracicaba, SP 13418-900, SP, Brazil. <sup>3</sup>fermathur1992@usp.br; <sup>4</sup>maisadesiqueira@gmail.com; <sup>5</sup>perla.oliveira@usp.br; <sup>7</sup>laurabinocente@gmail.com; <sup>8</sup>[hecarrer@usp.br](mailto:hecarrer@usp.br)

<sup>2</sup> Computational, Evolutionary and Systems Biology Laboratory, Center of Nuclear Energy in Agriculture, CENA, University of São Paulo. Av. Centenário 303, Piracicaba SP 13416-000, SP, Brazil. <sup>6</sup>diego.riano@cena.usp.br

\* Corresponding author: [hecarrer@usp.br](mailto:hecarrer@usp.br); Tel.: +55 19 3429.4344, Ext. 21.

**FMMH and MSP contributed equally to the manuscript**

**Table S1.** Primers used for gene expression analysis by RT-qPCR.

| Gene                        | Reference Number | Primers                                                                |
|-----------------------------|------------------|------------------------------------------------------------------------|
| <i>ANAC075</i> <sup>a</sup> | Tg01g12810       | FW - 5' TCCACGTCCCAAGAACCATG 3'<br>RV - 5' GCAGCCCATGATGACTTCCT 3'     |
| <i>ANAC33</i> <sup>b</sup>  | Tg02g10510       | FW - 5' ACGGGCAGAAGACTGATTGG 3'<br>RV - 5' TGGAAAGGTACAACGGGCTC 3'     |
| <i>SND2</i> <sup>c</sup>    | Tg02g15550       | FW - 5' CATCTCCGCTGATCCCCGAAT 3'<br>RV - 5' ATTCCTCGTCGCTGCTAACC 3'    |
| <i>VND7</i> <sup>d</sup>    | Tg03g10970       | FW - 5' CCCACAATGATGACTTAGATGCTC 3'<br>RV - 5' CGTTCCAACCTGGAGAAGGA 3' |
| <i>ANAC70</i> <sup>e</sup>  | Tg03g13770       | FW - 5' TGAGAGTGCAAGTCCAGCAG 3'<br>RV - 5' ACAAGGCGATCCCATTTCGTT 3'    |
| <i>NST1</i> <sup>f</sup>    | Tg05g19210       | FW - 5' CCACAGGGACACGCACTAAT 3'<br>RV - 5' GGGGCACGACCTTTGTAGAA 3'     |
| <i>XND1</i> <sup>g</sup>    | Tg08g13700       | FW - 5' GCCATCCAGATGTCATCCCA 3'<br>RV - 5' TCGACCCCTATAGTCTGCCA 3'     |
| <i>VND1</i> <sup>h</sup>    | Tg09g04510       | FW - 5' ATCCCACAACCTGGTGTGCA 3'<br>RV - 5' CCTTTTCGTTGGTGGCATGG 3'     |
| <i>VND2</i> <sup>i</sup>    | Tg11g04450       | FW - 5' CGTTCAATCTATGATGCCACTGG 3'<br>RV - 5' AAGTGTACCTGTTCTCCCC 3'   |
| <i>VNI2</i> <sup>j</sup>    | Tg15g04300       | FW - 5' CCCCTTGCCAGCTTCCATAA 3'<br>RV - 5' TGTTGCCTTCCAGTAGCCAG 3'     |
| <i>VND4</i> <sup>k</sup>    | Tg15g11670       | FW - 5' TTCTTCCACAATTCCGACGG 3'<br>RV - 5' GCCAAACAGTCCTCTTCCAT 3'     |
| <i>VND4</i> <sup>l</sup>    | Tg15g08390       | FW - 5' GCAATTTGCAGTCATCAGGA 3'<br>RV - 5' GGGATGCCACAACTTGTCT 3'      |
| <i>VND4</i> <sup>m</sup>    | Tg16g07170       | FW - 5' CGAGCCCCAAATGGACAGAA 3'<br>RV - 5' TCCTTGTTGGTTGCCATCCTC 3'    |

<sup>a</sup>ARABIDOPSIS NAC-DOMAIN CONTAINING PROTEIN 75, <sup>b</sup>ARABIDOPSIS NAC-DOMAIN CONTAINING PROTEIN 33, <sup>c</sup>SECUNDARY WALL-ASSOCIATED NAC DOMAIN 2, <sup>d</sup>VASCULAR-RELATED NAC-DOMAIN 7, <sup>e</sup>ARABIDOPSIS NAC-DOMAIN CONTAINING PROTEIN 70, <sup>f</sup>NAC SECUNDARY WALL THICKENING PROMOTING FACTOR, <sup>g</sup>XYLEM NAC DOMAIN 1, <sup>h</sup>VASCULAR-RELATED NAC-DOMAIN 1, <sup>i</sup>VASCULAR-RELATED NAC-DOMAIN 2, <sup>j</sup>VDN-INTERACTING 2, <sup>k</sup>VASCULAR-RELATED NAC-DOMAIN 4, <sup>l</sup>VASCULAR-RELATED NAC-DOMAIN 4, <sup>m</sup>VASCULAR-RELATED NAC-DOMAIN 4.

**Table S2.** Teak NAC gene family.

| Gene locus    | Gene Code | Arabidopsis locus description          | Arabidopsis ortholog locus | Score | E-value |
|---------------|-----------|----------------------------------------|----------------------------|-------|---------|
| Tg01g00150    | TGNAC001  | ANAC071                                | AT4G17980.1                | 288   | 2E-32   |
| Tg01g01920    | TGNAC002  | ANAC071                                | AT4G17980.1                | 301   | 2E-34   |
| Tg01g08840    | TGNAC003  | ANAC087                                | AT5G18270.1                | 702   | 7E-91   |
| Tg01g08850    | TGNAC004  | ANAC087                                | AT5G18270.1                | 704   | 1E-91   |
| Tg01g11480    | TGNAC005  | ANA072, RD26                           | AT4G27410.2                | 460   | 6E-55   |
| Tg01g12810.t1 | TGNAC006  | ANAC075                                | AT4G29230.1                | 1205  | 1E-164  |
| Tg01g12810.t3 | TGNAC007  | ANAC075                                | AT4G29230.1                | 1181  | 1E-160  |
| Tg01g17760    | TGNAC008  | ANAC090                                | AT5G22380.1                | 606   | 3E-80   |
| Tg02g02730    | TGNAC009  | ANAC087                                | AT5G18270.1                | 746   | 4E-98   |
| Tg02g05550    | TGNAC010  | ANAC075                                | AT4G29230.1                | 1309  | 1E-179  |
| Tg02g09900    | TGNAC011  | ANAC042                                | AT2G43000.1                | 686   | 7E-91   |
| Tg02g09660    | TGNAC012  | ANAC021                                | AT1G56010.2                | 762   | 1E-101  |
| Tg02g10410    | TGNAC013  | ANAC020                                | AT1G54330.1                | 750   | 1E-100  |
| Tg02g10510    | TGNAC014  | ANAC033                                | AT1G79580.1                | 706   | 2E-92   |
| Tg02g14690    | TGNAC015  | ANAC025                                | AT1G61110.1                | 729   | 8E-97   |
| Tg02g15550    | TGNAC016  | ANAC073, SND2                          | AT4G28500.1                | 890   | 1E-121  |
| Tg02g15570    | TGNAC017  | ANAC029, NAC-like, activated by AP3/PI | AT1G69490.1                | 309   | 2E-36   |
| Tg03g08530    | TGNAC018  | ANAC002, ATAF1                         | AT1G01720.1                | 933   | 1E-128  |
| Tg03g10560    | TGNAC019  | ANAC030, VND7                          | AT1G71930.1                | 726   | 4E-96   |
| Tg03g10970    | TGNAC020  | ANAC030, VND7                          | AT1G71930.1                | 726   | 4E-96   |
| Tg03g13770    | TGNAC021  | ANAC070                                | AT4G10350.1                | 807   | 1E-107  |
| Tg03g18100    | TGNAC022  | ANAC020                                | AT1G54330.1                | 199   | 6E-20   |
| Tg03g17880    | TGNAC023  | ANAC101, VND6                          | AT5G62380.1                | 207   | 9E-20   |
| Tg03g17890    | TGNAC024  | ANAC032                                | AT1G77450.1                | 161   | 2E-14   |
| Tg03g18120    | TGNAC025  | ANAC102                                | AT5G63790.1                | 199   | 7E-19   |
| Tg05g04990    | TGNAC026  | ANAC038                                | AT2G24430.2                | 772   | 1E-103  |
| Tg05g10730    | TGNAC027  | ANAC074                                | AT4G28530.1                | 685   | 6E-90   |
| Tg05g12200    | TGNAC028  | ANAC035                                | AT2G02450.2                | 855   | 1E-113  |
| Tg05g19210    | TGNAC029  | ANAC043, NSTI                          | AT2G46770.1                | 896   | 1E-120  |
| Tg05g19290    | TGNAC030  | ANAC043, NSTI                          | AT2G46770.1                | 889   | 1E-119  |
| Tg06g07710    | TGNAC031  | ANAC002, ATAF1                         | AT1G01720.1                | 432   | 1E-50   |
| Tg06g07670    | TGNAC032  | ANAC072, RD26                          | AT4G27410.2                | 432   | 1E-52   |
| Tg06g07740    | TGNAC033  | ANAC072                                | AT4G27410.2                | 228   | 4E-23   |
| Tg06g07750    | TGNAC034  | ANAC019                                | AT1G52890.1                | 216   | 9E-22   |
| Tg06g11580    | TGNAC035  | ANAC035                                | AT2G02450.2                | 849   | 1E-112  |
| Tg06g16210    | TGNAC036  | ANAC041                                | AT2G33480.1                | 407   | 7E-50   |
| Tg06g17630    | TGNAC037  | ANAC014                                | AT5G24590.2                | 699   | 1E-86   |
| Tg07g01830    | TGNAC038  | ANAC052                                | AT3G10490.2                | 742   | 1E-95   |
| Tg07g01840    | TGNAC039  | ANAC053                                | AT3G10500.1                | 913   | 1E-117  |
| Tg07g09430    | TGNAC040  | ANAC002, ATAF1                         | AT1G01720.1                | 691   | 2E-92   |
| Tg07g12160    | TGNAC041  | ANAC028                                | AT1G65910.1                | 1187  | 1E-157  |
| Tg08g06610.t1 | TGNAC042  | ANAC017                                | AT1G34190.1                | 1059  | 1E-139  |

|               |          |                                           |             |       |           |
|---------------|----------|-------------------------------------------|-------------|-------|-----------|
| Tg08g06610.t2 | TGNAC043 | ANAC017                                   | AT1G34190.1 | 332.8 | 5.6E-107  |
| Tg08g06620    | TGNAC044 | ANAC017                                   | AT1G34190.1 | 1077  | 1E-142    |
| Tg08g07120    | TGNAC045 | ANAC003                                   | AT1G76420.1 | 768   | 1E-101    |
| Tg08g13700    | TGNAC046 | ANAC104, XND1                             | AT5G64530.1 | 518   | 1E-68     |
| Tg08g17690    | TGNAC047 | ANAC036                                   | AT2G17040.1 | 680   | 5E-91     |
| Tg09g04510    | TGNAC048 | ANAC037, VND1                             | AT2G18060.1 | 1072  | 1E-147    |
| Tg09g02550.t1 | TGNAC049 | ANAC082, VNI1                             | AT5G09330.3 | 692   | 1E-85     |
| Tg09g02550.t2 | TGNAC050 | ANAC082, VNI1                             | AT5G09330.3 | 692   | 4E-87     |
| Tg09g02550.t6 | TGNAC051 | ANAC082, VNI1                             | AT5G09330.3 | 693   | 5E-87     |
| Tg09g02930    | TGNAC052 | ANAC104, XND1                             | AT5G64530.1 | 426   | 2E-54     |
| Tg09g03360    | TGNAC053 | ANAC002, ATAF1                            | AT1G01720.1 | 908   | 1E-124    |
| Tg09g15630    | TGNAC054 | ANAC009                                   | AT1G26870.1 | 785   | 1E-102    |
| Tg09g15920    | TGNAC055 | ANAC100                                   | AT5G61430.1 | 879   | 1E-118    |
| Tg10g01380    | TGNAC056 | ANAC057                                   | AT3G17730.1 | 847   | 1E-117    |
| Tg10g05660    | TGNAC057 | ANAC100                                   | AT5G61430.1 | 930   | 1E-126    |
| Tg10g05820    | TGNAC058 | ANAC060                                   | AT3G44290.1 | 162   | 7E-14     |
| Tg10g06080    | TGNAC059 | ANAC032                                   | AT1G77450.1 | 127   | 2E-09     |
| Tg10g07670    | TGNAC060 | ANAC083, VNI2                             | AT5G13180.1 | 456   | 1E-57     |
| Tg11g07410    | TGNAC061 | ANAC043 NSTI                              | AT2G46770.1 | 808   | 1E-107    |
| Tg11g02730    | TGNAC062 | ANAC033                                   | AT1G79580.1 | 98    | 0,000007  |
| Tg11g02740    | TGNAC063 | ANAC052                                   | AT3G10490.2 | 86    | 0,00001   |
| Tg11g03710    | TGNAC064 | ANAC100                                   | AT5G61430.1 | 939   | 1E-128    |
| Tg11g04450    | TGNAC065 | ANAC076, VND2                             | AT4G36160.1 | 166   | 1E-14     |
| Tg11g05530    | TGNAC066 | ANAC058                                   | AT3G18400.1 | 775   | 1E-103    |
| Tg11g07580    | TGNAC067 | NAC TRANSCRIPTION<br>FACTOR-LIKE 9, NTL9  | AT4G35580.2 | 652   | 9E-85     |
| Tg11g10750    | TGNAC068 | ANAC008                                   | AT1G25580.1 | 1237  | 1E-170    |
| Tg11g12110    | TGNAC069 | ANAC009                                   | AT1G26870.1 | 805   | 1E-105    |
| Tg11g11960    | TGNAC070 | ANAC029, NAC-like, activated by<br>AP3/PI | AT1G69490.1 | 789   | 1E-107    |
| Tg11g14670    | TGNAC071 | ANAC083, VNI2                             | AT5G13180.1 | 593   | 3E-78     |
| Tg12g02960    | TGNAC072 | ANAC083, VNI2                             | AT5G13180.1 | 169   | 4E-15     |
| Tg12g02970    | TGNAC073 | ANAC083, VNI2                             | AT3G10480.2 | 184   | 2E-16     |
| Tg12g03010    | TGNAC074 | ANAC050                                   | AT3G10480.2 | 747   | 5E-96     |
| Tg12g03030    | TGNAC075 | ANAC053                                   | AT3G10500.1 | 1027  | 1E-135    |
| Tg12g08930.t1 | TGNAC076 | ANAC104, XND1                             | AT5G64530.1 | 486   | 9E-64     |
| Tg12g08930.t3 | TGNAC077 | ANAC104, XND1                             | AT5G64530.1 | 319   | 6E-39     |
| Tg12g10590    | TGNAC078 | ANAC054/CUC1                              | AT3G15170.1 | 106   | 0,0000007 |
| Tg12g17130.t1 | TGNAC079 | ANAC036                                   | AT2G17040.1 | 773   | 1E-104    |
| Tg12g17130.t2 | TGNAC080 | ANAC036                                   | AT2G17040.1 | 582   | 9E-76     |
| Tg13g00820.t1 | TGNAC081 | ANAC042                                   | AT2G43000.1 | 649   | 1E-85     |
| Tg13g00820.t2 | TGNAC082 | ANAC042                                   | AT2G43000.1 | 433   | 3E-54     |
| Tg13g06720    | TGNAC083 | ANAC098, CUC2                             | AT5G53950.1 | 808   | 1E-107    |
| Tg13g07150.t1 | TGNAC084 | ANAC072, RD26                             | AT4G27410.2 | 959   | 1E-131    |
| Tg13g07150.t2 | TGNAC085 | ANAC072, RD26                             | AT4G27410.2 | 909   | 1E-123    |
| Tg13g09540    | TGNAC086 | ANAC090                                   | AT5G22380.1 | 568   | 2E-74     |
| Tg13g09550    | TGNAC087 | ANAC090                                   | AT5G22380.1 | 576   | 1E-75     |

|               |          |                                        |             |     |        |
|---------------|----------|----------------------------------------|-------------|-----|--------|
| Tg13g12990    | TGNAC088 | ANAC081                                | AT5G08790.1 | 346 | 2E-41  |
| Tg14g02070    | TGNAC089 | ANAC040                                | AT2G27300.1 | 595 | 6E-75  |
| Tg14g02200    | TGNAC090 | ANAC090                                | AT5G22380.1 | 647 | 3E-87  |
| Tg14g03970    | TGNAC091 | ANAC056                                | AT3G15510.1 | 324 | 7E-36  |
| Tg14g11050.t1 | TGNAC092 | ANAC074                                | AT4G28530.1 | 711 | 2E-94  |
| Tg14g11050.t2 | TGNAC093 | ANAC074                                | AT4G28530.1 | 714 | 2E-94  |
| Tg15g01040    | TGNAC094 | ANAC008                                | AT1G25580.1 | 719 | 1E-91  |
| Tg15g02070    | TGNAC095 | ANAC0100                               | AT5G61430.1 | 878 | 1E-118 |
| Tg15g04300    | TGNAC096 | ANAC083 VNI2                           | AT5G13180.1 | 744 | 1E-101 |
| Tg15g08390    | TGNAC097 | ANAC007, VND4                          | AT1G12260.1 | 211 | 5E-21  |
| Tg15g10730    | TGNAC098 | ANAC009                                | AT1G26870.1 | 759 | 1E-98  |
| Tg15g11030    | TGNAC099 | ANAC029, NAC-like, activated by AP3/PI | AT1G69490.1 | 830 | 1E-113 |
| Tg15g11670    | TGNAC100 | ANAC007, VND4                          | AT1G12260.1 | 979 | 1E-133 |
| Tg16g02600    | TGNAC101 | ANAC039                                | AT2G24430.2 | 640 | 3E-83  |
| Tg16g07170    | TGNAC102 | ANAC007, VND4                          | AT1G12260.1 | 979 | 1E-133 |
| Tg16g09080    | TGNAC103 | ANAC083, VNI2                          | AT5G13180.1 | 422 | 1E-52  |
| Tg16g09090    | TGNAC104 | ANAC083, VNI2                          | AT5G13180.1 | 447 | 2E-56  |
| Tg16g13420    | TGNAC105 | ANAC057                                | AT3G17730.1 | 589 | 6E-78  |
| Tg17g02630    | TGNAC106 | ANAC073, SND2                          | AT4G28500.1 | 871 | 1E-118 |
| Tg17g08390    | TGNAC107 | ANAC072, RD26                          | AT4G27410.2 | 899 | 1E-122 |
| Tg17g09060    | TGNAC108 | ANAC098, CUC2                          | AT5G53950.1 | 697 | 4E-90  |
| Tg17g08380    | TGNAC109 | ANAC056                                | AT3G15510.1 | 891 | 1E-120 |
| Tg18g00740    | TGNAC110 | ANAC030, VND7                          | AT1G71930.1 | 780 | 1E-104 |
| Tg18g04440    | TGNAC111 | ANAC041                                | AT2G33480.1 | 149 | 6E-12  |
| Tg18g09420    | TGNAC112 | ANAC032                                | AT1G77450.1 | 503 | 1E-58  |
| Tg18g11300.t1 | TGNAC113 | ANAC090                                | AT5G22380.1 | 573 | 3E-75  |
| Tg18g11300.t2 | TGNAC114 | ANAC090                                | AT5G22380.1 | 425 | 1E-53  |
| TgUn272g00030 | TGNAC115 | ANAC002, ATAF1                         | AT1G01720.1 | 939 | 1E-129 |
| TgUn296g00020 | TGNAC116 | ANAC037, VND1                          | AT2G18060.1 | 253 | 3E-28  |
| TgUn720g00010 | TGNAC117 | ANAC104, XND1                          | AT5G64530.1 | 366 | 2E-46  |

---

**Table S3.** Teak NAC proteins motifs. Logos of 10 motifs identified in TgNAC proteins using MEME, the E-value, motif consensus, and name annotation based previously published work (\* *Eucalyptus* [5] motif consensu and \*\* *Populus* [6] motif consensu) are presented.

| Motif          | E – value | Motif<br>consenso | Name anotation  |
|----------------|-----------|-------------------|-----------------|
| <p>Motif 1</p> | 1.90e-136 | motif3*           | NAC subdomain C |
|                |           | motif4*           | NAC subdomain D |
| <p>Motif 2</p> | 3.93e-146 | motif1*           | NAC subdomain A |
| <p>Motif 3</p> | 2.21e-173 | motif6*           | NAC subdomain D |
| <p>Motif 4</p> | 1.01e-281 | Motif9*           | –               |
| <p>Motif 5</p> | 5.16e-281 | motif2*           | NAC subdomain B |

|                 |           |           |                    |
|-----------------|-----------|-----------|--------------------|
| <p>Motif 6</p>  | 1.09e-172 | motif5*   | NAC<br>subdomain D |
| <p>Motif 7</p>  | 7.51e-177 | motif7*   | NAC<br>subdomain E |
| <p>Motif 8</p>  | 1.22e-46  | motif10** | —                  |
| <p>Motif 9</p>  | 2.91e-206 | —         | —                  |
| <p>Motif 10</p> | 7.82e-284 | —         | —                  |

**Table S4.** Cellular localization of *Tectona grandis* NAC proteins.

| Protein ID | Localization BUSCA  | Localization CELLO |
|------------|---------------------|--------------------|
| Tg01g00150 | nucleus             | nucleus            |
| Tg01g01920 | nucleus             | nucleus            |
| Tg01g08840 | nucleus             | nucleus            |
| Tg01g08850 | nucleus             | nucleus            |
| Tg01g11480 | nucleus             | nucleus            |
| Tg01g12810 | nucleus             | nucleus            |
| Tg01g17760 | nucleus             | nucleus            |
| Tg02g02730 | nucleus             | nucleus            |
| Tg02g05550 | nucleus             | nucleus            |
| Tg02g09660 | nucleus             | nucleus            |
| Tg02g09900 | nucleus             | nucleus            |
| Tg02g10410 | nucleus             | nucleus            |
| Tg02g10510 | nucleus             | cytoplasm          |
| Tg02g14690 | nucleus             | nucleus            |
| Tg02g15550 | nucleus             | nucleus            |
| Tg02g15570 | chloroplast         | nucleus            |
| Tg03g08530 | nucleus             | nucleus            |
| Tg03g10560 | nucleus             | nucleus            |
| Tg03g10970 | nucleus             | nucleus            |
| Tg03g13770 | nucleus             | nucleus            |
| Tg03g17880 | nucleus             | cytoplasm          |
| Tg03g17890 | nucleus             | plasma membrane    |
| Tg03g18100 | chloroplast         | chloroplast        |
| Tg03g18120 | nucleus             | cytoplasm          |
| Tg05g04990 | nucleus             | nucleus            |
| Tg05g10730 | nucleus             | nucleus            |
| Tg05g12200 | nucleus             | nucleus            |
| Tg05g19210 | nucleus             | nucleus            |
| Tg05g19290 | nucleus             | nucleus            |
| Tg06g07670 | nucleus             | nucleus            |
| Tg06g07710 | nucleus             | nucleus            |
| Tg06g07740 | nucleus             | nucleus            |
| Tg06g07750 | nucleus             | nucleus            |
| Tg06g11580 | nucleus             | nucleus            |
| Tg06g16210 | nucleus             | nucleus            |
| Tg06g17630 | endomembrane system | nucleus            |
| Tg07g01830 | nucleus             | nucleus            |
| Tg07g01840 | endomembrane system | nucleus            |
| Tg07g09430 | nucleus             | nucleus            |
| Tg07g12160 | endomembrane system | nucleus            |
| Tg08g06610 | endomembrane system | nucleus            |
| Tg08g06620 | endomembrane system | nucleus            |
| Tg08g07120 | nucleus             | nucleus            |
| Tg08g13700 | nucleus             | nucleus            |
| Tg08g17690 | nucleus             | nucleus            |



|            |                     |                     |
|------------|---------------------|---------------------|
| Tg09g02550 | nucleus             | nucleus             |
| Tg09g02930 | nucleus             | cytoplasm           |
| Tg09g03360 | nucleus             | nucleus             |
| Tg09g04510 | nucleus             | nucleus             |
| Tg09g15630 | nucleus             | nucleus             |
| Tg09g15920 | nucleus             | nucleus             |
| Tg10g01380 | nucleus             | nucleus             |
| Tg10g05660 | nucleus             | nucleus             |
| Tg10g05820 | nucleus             | nucleus             |
| Tg10g06080 | nucleus             | extracellular space |
| Tg10g07670 | nucleus             | nucleus             |
| Tg11g02730 | nucleus             | cytoplasm           |
| Tg11g02740 | extracellular space | cytoplasm           |
| Tg11g03710 | nucleus             | cytoplasm           |
| Tg11g04450 | nucleus             | cytoplasm           |
| Tg11g05530 | nucleus             | nucleus             |
| Tg11g07410 | nucleus             | nucleus             |
| Tg11g07580 | nucleus             | cytoplasm           |
| Tg11g10750 | nucleus             | nucleus             |
| Tg11g11960 | nucleus             | nucleus             |
| Tg11g12110 | nucleus             | nucleus             |
| Tg11g14670 | nucleus             | nucleus             |
| Tg12g02960 | nucleus             | nucleus             |
| Tg12g02970 | nucleus             | nucleus             |
| Tg12g03010 | nucleus             | nucleus             |
| Tg12g03030 | endomembrane system | nucleus             |
| Tg12g08930 | nucleus             | nucleus             |
| Tg12g10590 | nucleus             | nucleus             |
| Tg12g17130 | nucleus             | cytoplasm           |
| Tg13g00820 | nucleus             | nucleus             |
| Tg13g06720 | nucleus             | nucleus             |
| Tg13g07150 | nucleus             | nucleus             |
| Tg13g09540 | nucleus             | nucleus             |
| Tg13g09550 | nucleus             | nucleus             |
| Tg13g12990 | nucleus             | nucleus             |
| Tg14g02070 | plasma membrane     | nucleus             |
| Tg14g02200 | nucleus             | cytoplasm           |
| Tg14g03970 | nucleus             | nucleus             |
| Tg14g11050 | nucleus             | cytoplasm           |
| Tg15g01040 | nucleus             | nucleus             |
| Tg15g02070 | nucleus             | nucleus             |
| Tg15g04300 | nucleus             | nucleus             |
| Tg15g08390 | nucleus             | nucleus             |
| Tg15g10730 | nucleus             | nucleus             |
| Tg15g11030 | nucleus             | nucleus             |
| Tg15g11670 | nucleus             | nucleus             |
| Tg16g02600 | nucleus             | nucleus             |
| Tg16g07170 | nucleus             | nucleus             |

|               |                     |                 |
|---------------|---------------------|-----------------|
| Tg16g09080    | nucleus             | nucleus         |
| Tg16g09090    | nucleus             | nucleus         |
| Tg16g13420    | nucleus             | nucleus         |
| Tg17g02630    | nucleus             | nucleus         |
| Tg17g08380    | nucleus             | nucleus         |
| Tg17g08390    | nucleus             | nucleus         |
| Tg17g09060    | nucleus             | plasma membrane |
| Tg18g00740    | nucleus             | nucleus         |
| Tg18g04440    | nucleus             | nucleus         |
| Tg18g09420    | extracellular space | nucleus         |
| Tg18g11300    | nucleus             | nucleus         |
| TgUn296g00020 | chloroplast         | cytoplasm       |
| TgUn272g00030 | nucleus             | nucleus         |
| TgUn720g00010 | nucleus             | nucleus         |

**Table S5.** Genomic location of NACs in the genome of *Tectona grandis*.

| Gene_ID    | Pseudomolecule | Gene Start (pb) | Gene End (pb) |
|------------|----------------|-----------------|---------------|
| Tg01g00150 | 01             | 100651          | 102109        |
| Tg01g01920 | 01             | 1272763         | 1274227       |
| Tg01g08840 | 01             | 6650521         | 6652802       |
| Tg01g08850 | 01             | 6655440         | 6657402       |
| Tg01g11480 | 01             | 8960430         | 8962139       |
| Tg01g12810 | 01             | 10560086        | 10565923      |
| Tg01g17760 | 01             | 17473607        | 17475180      |
| Tg02g02730 | 02             | 2368292         | 2370614       |
| Tg02g05550 | 02             | 5861368         | 5866533       |
| Tg02g09660 | 02             | 11444805        | 11448869      |
| Tg02g09900 | 02             | 11642247        | 11644252      |
| Tg02g10410 | 02             | 12125444        | 12127643      |
| Tg02g10510 | 02             | 12212042        | 12216373      |
| Tg02g14690 | 02             | 15067485        | 15068720      |
| Tg02g15550 | 02             | 15691858        | 15695487      |
| Tg02g15570 | 02             | 15707390        | 15708003      |
| Tg03g08530 | 03             | 10338456        | 10340163      |
| Tg03g10560 | 03             | 11813720        | 11815838      |
| Tg03g10970 | 03             | 12085352        | 12087581      |
| Tg03g13770 | 03             | 13974114        | 13977147      |
| Tg03g17880 | 03             | 17073920        | 17075388      |
| Tg03g17890 | 03             | 17083750        | 17089834      |

|            |    |          |          |
|------------|----|----------|----------|
| Tg03g18100 | 03 | 17311080 | 17312660 |
| Tg03g18120 | 03 | 17324513 | 17325847 |
| Tg05g04990 | 05 | 3563051  | 3567504  |
| Tg05g10730 | 05 | 8509349  | 8512085  |
| Tg05g12200 | 05 | 11165686 | 11168157 |
| Tg05g19210 | 05 | 17430830 | 17432430 |
| Tg05g19290 | 05 | 17510868 | 17512817 |
| Tg06g07670 | 06 | 5426077  | 5427523  |
| Tg06g07710 | 06 | 5461617  | 5463672  |
| Tg06g07740 | 06 | 5481308  | 5482406  |
| Tg06g07750 | 06 | 5484991  | 5486584  |
| Tg06g11580 | 06 | 9451036  | 9453886  |
| Tg06g16210 | 06 | 15389293 | 15391097 |
| Tg06g17630 | 06 | 16308386 | 16311887 |
| Tg07g01830 | 07 | 1417889  | 1422065  |
| Tg07g01840 | 07 | 1426175  | 1430978  |
| Tg07g09430 | 07 | 9986626  | 9988534  |
| Tg07g12160 | 07 | 13653345 | 13657814 |
| Tg08g06610 | 08 | 4671777  | 4675732  |
| Tg08g06620 | 08 | 4676644  | 4679788  |
| Tg08g07120 | 08 | 5045264  | 5048014  |
| Tg08g13700 | 08 | 13606310 | 13607704 |
| Tg08g17690 | 08 | 16640344 | 16641591 |
| Tg09g02550 | 09 | 2108466  | 2115424  |
| Tg09g02930 | 09 | 2532679  | 2534247  |
| Tg09g03360 | 09 | 3008524  | 3010544  |
| Tg09g04510 | 09 | 4929000  | 4931759  |
| Tg09g15630 | 09 | 15581846 | 15583632 |
| Tg09g15920 | 09 | 15875987 | 15877920 |
| Tg10g01380 | 10 | 825541   | 828407   |
| Tg10g05660 | 10 | 4133932  | 4135739  |
| Tg10g05820 | 10 | 4296708  | 4297518  |
| Tg10g06080 | 10 | 4539325  | 4547787  |
| Tg10g07670 | 10 | 6369428  | 6370530  |
| Tg11g02730 | 11 | 2364113  | 2364779  |
| Tg11g02740 | 11 | 2369832  | 2370644  |

|            |    |          |          |
|------------|----|----------|----------|
| Tg11g03710 | 11 | 3287731  | 3289306  |
| Tg11g04450 | 11 | 4346122  | 4347447  |
| Tg11g05530 | 11 | 6258532  | 6261052  |
| Tg11g07410 | 11 | 9693204  | 9695369  |
| Tg11g07580 | 11 | 9919320  | 9922886  |
| Tg11g10750 | 11 | 13053622 | 13058541 |
| Tg11g11960 | 11 | 13937913 | 13939282 |
| Tg11g12110 | 11 | 14064504 | 14066034 |
| Tg11g14670 | 11 | 15902286 | 15903495 |
| Tg12g02960 | 12 | 2124414  | 2125307  |
| Tg12g02970 | 12 | 2127026  | 2127923  |
| Tg12g03010 | 12 | 2159430  | 2165896  |
| Tg12g03030 | 12 | 2169965  | 2174339  |
| Tg12g08930 | 12 | 9005829  | 9007473  |
| Tg12g10590 | 12 | 10658980 | 10659737 |
| Tg12g17130 | 12 | 15364039 | 15365527 |
| Tg13g00820 | 13 | 506214   | 507523   |
| Tg13g06720 | 13 | 6415767  | 6418101  |
| Tg13g07150 | 13 | 7167495  | 7169625  |
| Tg13g09540 | 13 | 10758767 | 10760459 |
| Tg13g09550 | 13 | 10784952 | 10787577 |
| Tg13g12990 | 13 | 13515197 | 13517742 |
| Tg14g02070 | 14 | 1278566  | 1284409  |
| Tg14g02200 | 14 | 1361124  | 1362421  |
| Tg14g03970 | 14 | 2885920  | 2887672  |
| Tg14g11050 | 14 | 10646580 | 10650310 |
| Tg15g01040 | 15 | 920180   | 923969   |
| Tg15g02070 | 15 | 2810419  | 2812071  |
| Tg15g04300 | 15 | 6384214  | 6385961  |
| Tg15g08390 | 15 | 9676357  | 9680089  |
| Tg15g10730 | 15 | 11502116 | 11503715 |
| Tg15g11030 | 15 | 11702280 | 11703828 |
| Tg15g11670 | 15 | 12098199 | 12100357 |
| Tg16g02600 | 16 | 1973134  | 1976925  |
| Tg16g07170 | 16 | 6673219  | 6677803  |
| Tg16g09080 | 16 | 10385023 | 10386605 |

|               |                |          |          |
|---------------|----------------|----------|----------|
| Tg16g09090    | 16             | 10395308 | 10397373 |
| Tg16g13420    | 16             | 14015643 | 14018968 |
| Tg17g02630    | 17             | 2124067  | 2126017  |
| Tg17g08380    | 17             | 8935438  | 8937265  |
| Tg17g08390    | 17             | 8955890  | 8957571  |
| Tg17g09060    | 17             | 9535173  | 9536792  |
| Tg18g00740    | 18             | 434746   | 436426   |
| Tg18g04440    | 18             | 3341645  | 3345250  |
| Tg18g09420    | 18             | 6931431  | 6933095  |
| Tg18g11300    | 18             | 8596625  | 8598152  |
| TgUn296g00020 | Scaffold_Un296 | 36115    | 36486    |
| TgUn272g00030 | Scaffold_Un272 | 23446    | 25033    |
| TgUn720g00010 | Scaffold_Un720 | 19039    | 19583    |

[illegible]

|               |       |        |       |       |       |       |       |       |        |       |       |       |
|---------------|-------|--------|-------|-------|-------|-------|-------|-------|--------|-------|-------|-------|
| Tg12g17130    | 1.18  | 21.98  | 4.66  | 1.61  | 1.39  | 1.58  | 0.54  | 0.20  | 2.71   | 0.34  | 1.61  | 0.73  |
| Tg05g04990    | 1.34  | 19.87  | 0.23  | 4.50  | 0.00  | 0.38  | 0.00  | 0.00  | 0.00   | 0.00  | 0.00  | 0.09  |
| Tg08g13700    | 1.91  | 38.65  | 0.16  | 4.20  | 0.00  | 0.00  | 0.00  | 0.00  | 0.81   | 1.58  | 0.16  | 0.00  |
| Tg11g02730    | 0.00  | 1.15   | 0.00  | 0.00  | 0.00  | 0.00  | 0.00  | 0.00  | 0.00   | 0.00  | 0.00  | 0.00  |
| Tg11g14670    | 0.00  | 0.18   | 0.00  | 0.00  | 0.00  | 0.00  | 0.00  | 0.00  | 0.00   | 0.00  | 0.00  | 0.00  |
| Tg01g08850    | 0.62  | 2.18   | 0.80  | 0.00  | 0.00  | 0.00  | 0.00  | 0.00  | 0.22   | 0.00  | 0.00  | 0.00  |
| Tg09g15630    | 2.41  | 6.26   | 0.09  | 0.22  | 0.00  | 0.00  | 0.00  | 0.00  | 0.54   | 0.00  | 0.00  | 0.00  |
| Tg02g10510    | 0.84  | 3.40   | 0.00  | 0.00  | 0.00  | 0.00  | 0.00  | 0.00  | 0.00   | 0.00  | 0.00  | 0.00  |
| Tg11g12110    | 0.17  | 0.76   | 0.11  | 0.00  | 0.00  | 0.00  | 0.00  | 0.00  | 0.00   | 0.00  | 0.00  | 0.00  |
| Tg11g05530    | 0.30  | 4.63   | 0.00  | 2.27  | 0.18  | 0.00  | 0.00  | 0.00  | 0.19   | 0.00  | 0.00  | 0.00  |
| Tg11g04450    | 0.47  | 2.27   | 0.00  | 0.66  | 0.00  | 0.00  | 0.00  | 0.00  | 1.40   | 0.00  | 0.00  | 0.00  |
| Tg02g02730    | 12.30 | 66.67  | 26.91 | 39.17 | 0.32  | 0.38  | 0.29  | 0.32  | 33.50  | 2.32  | 1.96  | 4.53  |
| Tg14g11050    | 0.53  | 2.50   | 0.46  | 0.71  | 1.62  | 1.98  | 0.82  | 1.34  | 14.71  | 15.34 | 4.46  | 5.10  |
| TgUn272g00030 | 0.76  | 0.54   | 0.00  | 0.00  | 0.25  | 0.21  | 1.13  | 0.00  | 2.13   | 1.85  | 0.00  | 0.13  |
| Tg11g07580    | 9.67  | 18.14  | 15.66 | 23.50 | 14.74 | 20.90 | 29.76 | 14.71 | 87.53  | 19.41 | 27.98 | 27.64 |
| Tg01g12810    | 0.64  | 2.50   | 4.57  | 2.88  | 1.01  | 0.20  | 1.77  | 2.48  | 23.14  | 2.52  | 4.37  | 6.31  |
| Tg02g05550    | 0.31  | 1.82   | 1.98  | 2.97  | 0.20  | 0.08  | 1.86  | 0.60  | 9.05   | 0.79  | 1.43  | 2.46  |
| Tg05g10730    | 5.88  | 3.58   | 0.59  | 3.67  | 0.95  | 1.70  | 1.76  | 0.24  | 13.45  | 2.91  | 0.25  | 0.28  |
| Tg11g11960    | 53.41 | 57.75  | 10.13 | 21.68 | 0.88  | 0.00  | 1.20  | 2.84  | 296.03 | 3.42  | 4.49  | 5.63  |
| Tg02g09660    | 26.62 | 23.09  | 4.39  | 53.19 | 0.37  | 0.18  | 0.00  | 0.00  | 169.37 | 0.39  | 2.22  | 3.04  |
| Tg02g09900    | 5.91  | 12.81  | 3.11  | 1.00  | 0.35  | 0.99  | 0.65  | 0.00  | 21.72  | 0.15  | 0.57  | 0.75  |
| Tg15g11030    | 8.85  | 112.13 | 2.99  | 6.82  | 16.74 | 23.20 | 27.62 | 7.59  | 248.02 | 56.38 | 11.24 | 7.56  |
| Tg18g09420    | 8.12  | 20.44  | 36.26 | 28.97 | 7.26  | 5.31  | 9.81  | 12.54 | 30.17  | 10.72 | 14.60 | 13.61 |
| Tg12g03030    | 34.60 | 66.63  | 70.97 | 67.51 | 20.75 | 20.03 | 25.90 | 22.35 | 67.57  | 20.67 | 25.46 | 27.54 |
| Tg10g05660    | 10.62 | 48.13  | 22.42 | 39.82 | 0.15  | 0.48  | 0.84  | 0.30  | 87.41  | 0.39  | 0.67  | 0.66  |
| Tg18g04440    | 13.25 | 45.66  | 27.07 | 24.54 | 2.14  | 1.25  | 4.39  | 6.94  | 52.08  | 6.22  | 4.80  | 6.72  |
| Tg08g06620    | 9.27  | 15.04  | 12.16 | 14.47 | 5.90  | 6.76  | 9.33  | 11.38 | 20.15  | 13.32 | 9.65  | 10.84 |
| Tg12g03010    | 47.12 | 60.89  | 61.95 | 55.07 | 25.81 | 21.35 | 34.92 | 48.40 | 108.10 | 62.95 | 36.70 | 31.55 |
| Tg07g01830    | 5.55  | 10.16  | 3.77  | 10.84 | 4.79  | 3.61  | 6.04  | 7.19  | 8.18   | 10.39 | 5.54  | 5.56  |
| Tg05g19210    | 0.00  | 0.20   | 0.00  | 0.60  | 0.00  | 0.00  | 0.00  | 0.00  | 0.45   | 0.00  | 0.00  | 0.00  |

|            |        |        |         |        |       |       |       |       |        |       |       |       |
|------------|--------|--------|---------|--------|-------|-------|-------|-------|--------|-------|-------|-------|
| Tg07g01840 | 12.28  | 45.52  | 17.02   | 51.50  | 6.43  | 5.72  | 6.95  | 7.36  | 52.87  | 4.95  | 9.01  | 9.70  |
| Tg10g01380 | 0.87   | 0.99   | 1.09    | 2.89   | 0.00  | 0.00  | 0.00  | 0.00  | 1.57   | 1.25  | 0.35  | 0.38  |
| Tg17g02630 | 1.18   | 1.52   | 2.35    | 17.84  | 0.18  | 0.00  | 0.67  | 0.18  | 5.20   | 0.47  | 0.10  | 0.45  |
| Tg02g15550 | 0.82   | 5.06   | 3.10    | 29.42  | 0.45  | 0.24  | 2.62  | 5.16  | 13.37  | 4.10  | 5.50  | 6.73  |
| Tg17g08380 | 1.47   | 2.98   | 0.77    | 73.93  | 0.91  | 0.87  | 2.88  | 2.01  | 42.10  | 1.10  | 2.41  | 2.11  |
| Tg06g07710 | 0.00   | 0.00   | 0.15    | 0.09   | 0.16  | 0.00  | 0.00  | 0.00  | 0.00   | 0.00  | 0.00  | 0.00  |
| Tg05g12200 | 1.85   | 0.49   | 9.90    | 0.41   | 1.15  | 0.00  | 0.00  | 0.49  | 0.34   | 0.00  | 0.00  | 0.00  |
| Tg18g11300 | 8.38   | 5.31   | 49.29   | 6.23   | 0.00  | 0.00  | 0.00  | 0.00  | 3.05   | 0.00  | 0.00  | 0.14  |
| Tg13g09540 | 0.10   | 0.41   | 2.74    | 0.63   | 0.00  | 0.00  | 0.00  | 0.00  | 0.00   | 0.00  | 0.00  | 0.00  |
| Tg06g07740 | 0.00   | 0.16   | 0.62    | 0.18   | 0.00  | 0.00  | 0.00  | 0.00  | 0.00   | 0.00  | 0.00  | 0.00  |
| Tg09g03360 | 20.17  | 155.52 | 640.42  | 14.49  | 3.65  | 1.83  | 1.25  | 1.91  | 13.88  | 3.74  | 3.52  | 3.10  |
| Tg14g02200 | 0.90   | 31.92  | 114.66  | 0.45   | 0.00  | 0.21  | 0.00  | 0.00  | 1.11   | 0.00  | 0.14  | 0.16  |
| Tg06g17630 | 15.48  | 57.89  | 329.98  | 38.15  | 19.40 | 15.43 | 20.15 | 20.18 | 52.79  | 26.55 | 27.95 | 27.50 |
| Tg08g17690 | 3.68   | 10.42  | 63.94   | 6.65   | 0.00  | 0.54  | 0.21  | 0.00  | 4.57   | 0.00  | 0.12  | 0.41  |
| Tg07g09430 | 38.58  | 208.89 | 1150.97 | 18.87  | 6.21  | 7.76  | 3.38  | 3.34  | 52.09  | 11.76 | 6.21  | 7.45  |
| Tg08g06610 | 27.56  | 63.79  | 108.05  | 20.41  | 11.40 | 8.33  | 20.05 | 17.99 | 42.23  | 12.76 | 18.79 | 18.31 |
| Tg09g04510 | 1.24   | 2.04   | 3.40    | 1.59   | 0.00  | 0.00  | 0.00  | 0.00  | 0.00   | 0.00  | 0.00  | 0.11  |
| Tg03g08530 | 138.50 | 155.50 | 444.30  | 127.98 | 10.76 | 9.71  | 12.97 | 15.67 | 80.78  | 23.05 | 14.06 | 20.71 |
| Tg14g03980 | 0.00   | 0.00   | 4.79    | 4.80   | 1.81  | 0.00  | 0.00  | 0.00  | 0.00   | 0.00  | 0.00  | 0.00  |
| Tg06g16210 | 9.88   | 13.62  | 31.56   | 14.82  | 0.43  | 0.17  | 0.79  | 1.30  | 22.27  | 2.03  | 11.19 | 15.95 |
| Tg07g12160 | 0.72   | 0.43   | 1.62    | 0.50   | 0.00  | 0.00  | 0.00  | 0.00  | 1.56   | 0.12  | 0.67  | 0.42  |
| Tg16g09090 | 11.40  | 2.79   | 26.90   | 6.19   | 0.00  | 0.00  | 0.00  | 0.00  | 26.80  | 0.43  | 3.75  | 4.25  |
| Tg17g08390 | 42.81  | 44.32  | 266.29  | 72.71  | 1.72  | 2.10  | 3.88  | 5.35  | 148.93 | 11.15 | 15.37 | 19.90 |
| Tg13g07150 | 46.39  | 13.61  | 310.16  | 36.67  | 21.62 | 18.72 | 25.92 | 40.52 | 187.71 | 52.85 | 53.62 | 57.24 |
| Tg09g15920 | 35.20  | 16.60  | 18.58   | 71.84  | 10.58 | 10.36 | 20.71 | 44.33 | 32.06  | 56.84 | 54.08 | 62.53 |
| Tg16g09080 | 1.85   | 2.67   | 2.24    | 3.42   | 0.00  | 0.00  | 0.00  | 0.00  | 1.61   | 0.68  | 1.39  | 5.07  |
| Tg16g07170 | 1.40   | 2.56   | 3.33    | 3.26   | 0.00  | 0.00  | 0.00  | 0.00  | 0.20   | 0.16  | 0.00  | 0.47  |
| Tg10g07670 | 1.18   | 1.94   | 1.51    | 2.97   | 0.00  | 0.00  | 0.00  | 0.00  | 0.00   | 0.00  | 0.00  | 0.00  |
| Tg15g08390 | 1.27   | 1.48   | 1.82    | 2.79   | 0.00  | 0.00  | 0.00  | 0.00  | 0.00   | 0.00  | 0.00  | 0.08  |
| Tg18g00740 | 0.40   | 1.28   | 0.75    | 2.09   | 0.00  | 0.00  | 0.00  | 0.00  | 0.26   | 0.00  | 0.00  | 0.00  |

|               |       |       |       |       |      |      |      |      |      |      |      |      |
|---------------|-------|-------|-------|-------|------|------|------|------|------|------|------|------|
| Tg11g03710    | 1.81  | 4.75  | 1.25  | 7.62  | 0.00 | 0.00 | 0.00 | 0.18 | 2.10 | 0.00 | 0.10 | 0.23 |
| Tg03g10560    | 0.11  | 0.47  | 0.00  | 0.45  | 0.00 | 0.00 | 0.00 | 0.00 | 0.00 | 0.00 | 0.00 | 0.00 |
| Tg11g10750    | 15.08 | 29.03 | 10.07 | 28.36 | 3.53 | 2.23 | 5.07 | 7.62 | 5.67 | 3.95 | 4.14 | 5.87 |
| Tg08g07120    | 0.08  | 0.00  | 0.21  | 1.73  | 0.42 | 0.00 | 0.39 | 0.00 | 0.00 | 0.00 | 0.11 | 0.00 |
| TgUn720g00010 | 0.00  | 0.00  | 0.00  | 14.01 | 2.03 | 0.00 | 1.59 | 0.00 | 0.00 | 0.00 | 0.00 | 0.00 |
| Tg17g09060    | 0.18  | 0.48  | 0.11  | 4.81  | 0.00 | 0.00 | 0.00 | 0.00 | 0.00 | 0.00 | 0.13 | 0.29 |
| Tg15g11670    | 0.00  | 0.00  | 0.00  | 0.71  | 0.00 | 0.00 | 0.00 | 0.00 | 0.00 | 0.00 | 0.00 | 0.00 |
| Tg12g02970    | 0.00  | 0.00  | 0.00  | 0.16  | 0.00 | 0.00 | 0.00 | 0.00 | 0.00 | 0.00 | 0.00 | 0.00 |
| Tg01g11480    | 0.00  | 0.00  | 0.00  | 0.11  | 0.00 | 0.00 | 0.00 | 0.00 | 0.00 | 0.00 | 0.00 | 0.00 |
| g10g06080     | 0.00  | 0.00  | 0.00  | 1.37  | 0.00 | 0.00 | 0.00 | 0.00 | 0.00 | 0.00 | 0.00 | 0.00 |
| Tg12g08930    | 0.33  | 3.83  | 0.80  | 45.32 | 1.61 | 1.15 | 0.38 | 0.41 | 0.43 | 0.35 | 0.92 | 0.76 |
| Tg11g07410    | 0.71  | 2.30  | 0.32  | 41.64 | 0.00 | 0.14 | 0.00 | 0.00 | 1.25 | 0.00 | 0.26 | 0.70 |
| Tg13g06720    | 0.85  | 2.86  | 0.29  | 14.12 | 0.00 | 0.00 | 0.68 | 0.48 | 0.26 | 0.00 | 0.00 | 0.00 |
| Tg15g02070    | 1.15  | 4.34  | 1.11  | 16.57 | 0.87 | 1.53 | 0.80 | 0.69 | 2.19 | 2.87 | 1.07 | 1.32 |
| Tg05g19290    | 0.00  | 0.75  | 0.00  | 2.49  | 0.00 | 0.14 | 0.00 | 0.00 | 0.19 | 0.00 | 0.00 | 0.00 |
| Tg15g01040    | 0.41  | 0.09  | 0.17  | 0.54  | 0.00 | 0.00 | 0.00 | 0.00 | 0.00 | 0.15 | 0.00 | 0.42 |
| Tg02g10410    | 1.24  | 0.23  | 0.11  | 1.12  | 0.00 | 0.00 | 0.00 | 0.00 | 0.00 | 0.00 | 0.00 | 0.00 |
| Tg16g13420    | 0.13  | 0.00  | 0.00  | 0.21  | 0.00 | 0.00 | 0.00 | 0.00 | 0.00 | 0.00 | 0.00 | 0.00 |

---

Sequence Read Archive (SRA) codigs of RNAseq samples used; <sup>a</sup>seedlings\_SRR2080097; <sup>b</sup>roots\_SRR2080096; <sup>c</sup>leaves\_SRR2080095; <sup>d</sup>flowers\_SRR2080094; <sup>e</sup>stem12yr1\_SRR2080131; <sup>f</sup>stem12yr2\_SRR2080132; <sup>g</sup>stem60yr1\_SRR2080137; <sup>h</sup>stem60yr2\_SRR2080138; <sup>i</sup>branch12yr1\_SRR2080148; <sup>j</sup>branch12yr2\_SRR2080149; <sup>k</sup>branch60yr1\_SRR2080150; <sup>l</sup>branch60yr2\_SRR2080151.



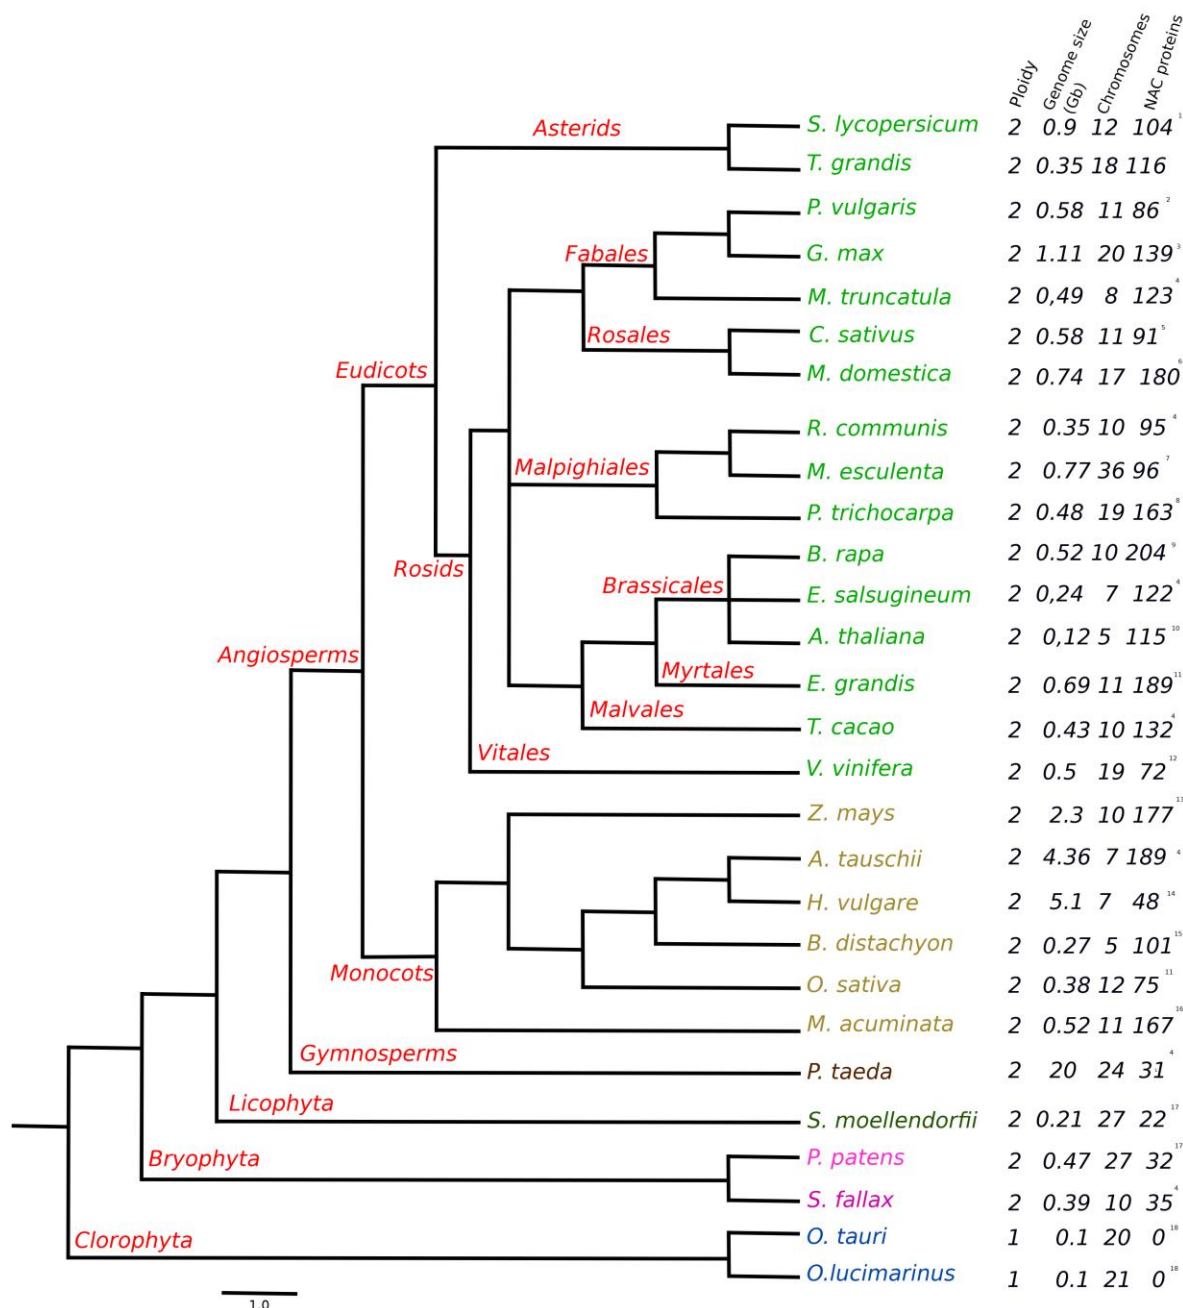

**Figure S1.** Phylogenetic profile of 28 plant species and numbers of identified NAC proteins. Ploidy level, the plant genome size (Gb), the number of chromosomes and total number of proteins identified in each genome. The genomes were annotated and assembled in Phytozome12 (<https://phytozome.jgi.doe.gov>). Subscripts on NAC proteins number refers to the Genome Reference of each species. The references are presented below.

1. Su, H., Zhang, S., Yin, Y. et al. Genome-wide analysis of NAM-ATAF1,2-CUC2 transcription factor family in *Solanum lycopersicum*. J. Plant Biochem. Biotechnol. 2015, 24, 176. <https://doi.org/10.1007/s13562-014-0255-9>
2. Wu, J., Wang, L. & Wang, S. Comprehensive analysis and discovery of drought-related NAC transcription factors in common bean. BMC Plant Biol, 2016, 16, 193. doi:10.1186/s12870-016-0882-5
3. Hussain, R.M., Ali, M., Feng, X. et al. The essence of NAC gene family to the cultivation of drought-resistant soybean (*Glycine max* L. Merr.) cultivars. BMC Plant Biol 2017, 17, 55. doi:10.1186/s12870-017-1001-y
4. Jin, J.P.; Tian, F.; Yang, D.C.; Meng, Y.Q.; Kong, L.; Luo, J.C.; Gao, G. PlantTFDB 4.0: toward a central hub for transcription factors and regulatory interactions in plants. Nucleic Acids Res. 2017, 45, 1040-1045. DOI: 10.1093/nar/gkw982.
5. Liu, X., wang, T., Bartholomew, E. et al. Comprehensive analysis of NAC transcription factors and their expression during fruit spine development in cucumber (*Cucumis sativus* L.). Hortic Res 2018, 5, 31. doi:10.1038/s41438-018-0036-z
6. H.Y. Su, S.Z. Zhang, X.W. Yuan, C.T. Chen, X.F. Wang, Y.J. Hao. Genome-wide analysis and identification of stress-responsive genes of the NAM-ATAF1, 2-CUC2 transcription factor family in apple. Plant Physiol. Biochem. 2013, 71, pp. 11-21
7. Hu W, Wei Y, Xia Z, Yan Y, Hou X, et al. Genome-Wide Identification and Expression Analysis of the NAC Transcription Factor Family in Cassava. PLOS ONE, 2015, 10, e0136993. <https://doi.org/10.1371/journal.pone.0136993>

8. Hu R.; Guang, Q.; Yingzhen, K.; Dejing, K.; Qian, G.; Gongke, Z. Comprehensive Analysis of NAC Domain Transcription Factor Gene Family in *Populus trichocarpa*. *BMC Plant Biol.* 2010, 10, 145:1-145:23. DOI: 10.1186 / 1471-2229-10-145.
9. Liu, T., Song, X., Duan, W. et al. Genome-Wide Analysis and Expression Patterns of NAC Transcription Factor Family Under Different Developmental Stages and Abiotic Stresses in Chinese Cabbage *Plant Mol Biol Rep*, 2014, 32, 1041. <https://doi.org/10.1007/s11105-014-0712-6>
10. Ooka H, Satoh K, Doi K, Nagata T, Otomo Y, Murakami K, Matsubara K, Osato N, Kawai J, Carninci P, Hayashizaki Y, Suzuki K, Kojima K, Takahara Y, Yamamoto K, Kikuchi S: Comprehensive analysis of NAC family genes in *Oryza sativa* and *Arabidopsis thaliana*. *DNA Res*, 2003, 10, 239-247. DOI: 10.1093/dnares/10.6.239
11. Hussey, S.G., Saïdi, M.N., Hefer, C.A., Myburg, A.A. and Grima-Pettenati, J. Structural, evolutionary and functional analysis of the NAC domain protein family in *Eucalyptus*. *New Phytol*, 2015, 206: 1337-1350.
12. Wang, N., Zheng, Y., Xin, H. et al. Comprehensive analysis of NAC domain transcription factor gene family in *Vitis vinifera* *Plant Cell Rep*, 2013, 32: 61. <https://doi.org/10.1007/s00299-012-1340-y>
13. Li, Liang & Ma, Yiwen & Zhang, Shihuang & Hao, Zhuanfang & Li, Xinhai. Zea mays NAC transcription factor family members: Their genomic characteristics and relationship with drought stress. *Research Journal of Biotechnology*. 2015, 10. 63-77.
14. You J, Zhang L, Song B, Qi X, Chan Z. Systematic Analysis and Identification of Stress-Responsive Genes of the NAC Gene Family in *Brachypodium distachyon*. *PLoS ONE*, 2015, 10: e0122027. <https://doi.org/10.1371/journal.pone.0122027>
15. Christiansen, M.W., Holm, P.B. & Gregersen, P.L. Characterization of barley (*Hordeum vulgare* L.) NAC transcription factors suggests conserved functions compared to both monocots and dicots. *BMC Res Notes*, 2011, 4, 302. doi:10.1186/1756-0500-4-302
16. Cenci, A., Guignon, V., Roux, N. et al. Genomic analysis of NAC transcription factors in banana (*Musa acuminata*) and definition of NAC orthologous groups for monocots and dicots *Plant Mol Biol*, 2014, 85: 63. <https://doi.org/10.1007/s11103-013-0169-2>
17. Aude Maugarny-Calès, Beatriz Gonçalves, Stefan Jouannic, Michael Melkonian, Kane Ka-Shu Wong, Patrick Laufs, Apparition of the NAC Transcription Factors Predates the Emergence of Land Plants, *Molecular Plant*, 2016, 9, 1345-1348. doi: <https://doi.org/10.1016/j.molp.2016.05.016>.
18. Zhu, T., Nevo, E., Sun, D. and Peng, J. PHYLOGENETIC ANALYSES UNRAVEL THE EVOLUTIONARY HISTORY OF NAC PROTEINS IN PLANTS. *Evolution*, 2012, 66: 1833-1848. doi:10.1111/j.1558-5646.2011.01553.x
