# Supplementary figures and images for: Analysis of NAC Domain Transcription Factor Genes of Tectona grandis L.f. Involved in Secondary Cell Wall Deposition
Source: MDPI journal article supplement (doi:10.3390/genes11010020), 2019-12-23

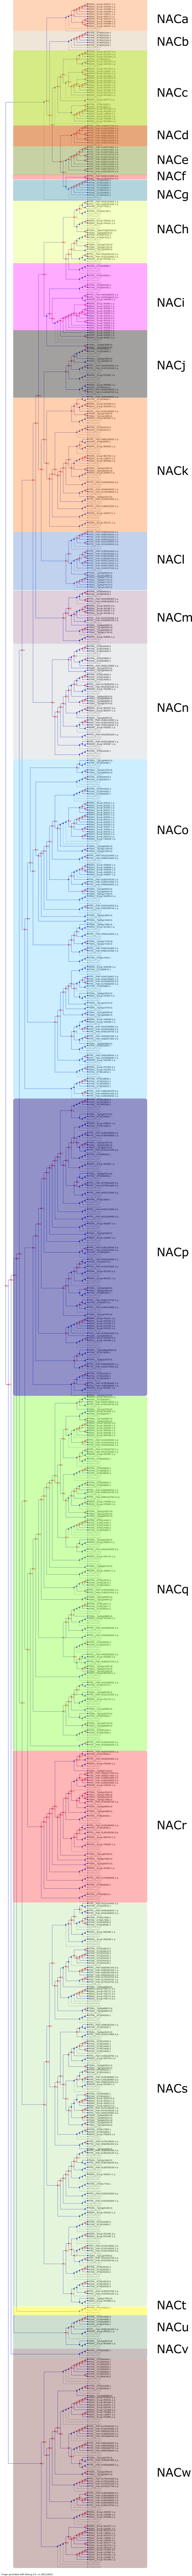

Supplement: s1 [file s1]
